# Supplementary material
Source: Springer Nature journal article supplement (https://www.springermedizin.de/resource/supplementary/12889_2009_2264_MOESM2_ESM.pdf/9485186)

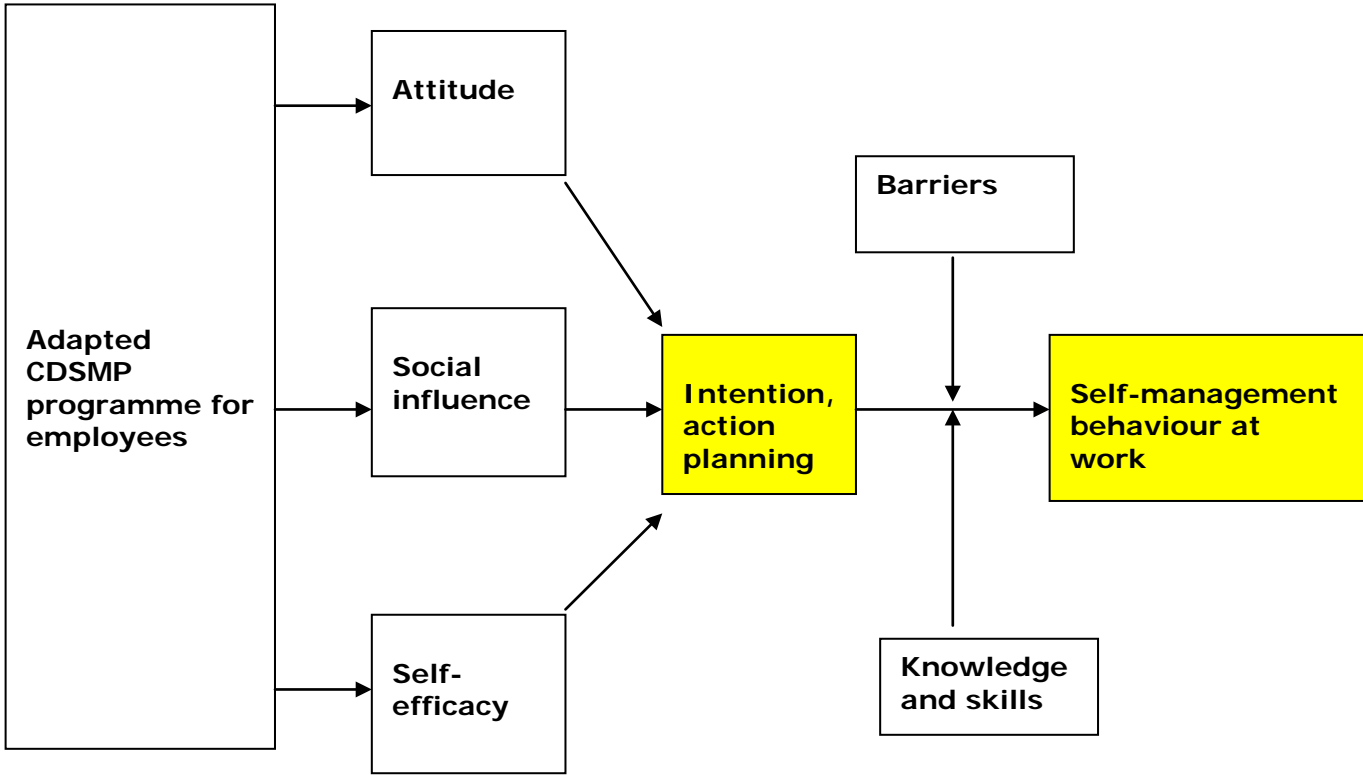

Supplement: MOESM2 [file 9485186]
